# Supplementary material
Source: publisher figshare collection journal article supplement (https://gsajournals.figshare.com/ndownloader/files/13904894)
Supplement: Supplementary file 1 [file 13904894]

## Sheet: phenotype data
		DTH
		2014	2015	2016
Early lines
	129	57.1667	58.75	68.8333
	102	57.8333	58	63.1667
	135	58.3333	65.5	76.1667
	174	58.3333	60.6667	65.3333
	134	58.6667	59.1667	75.1667
	116	59.8333	65.3333	63.3333
	148	61.4	60.1667	72.5
	136	61.8333	70.5	75
	115	62.3333	67.8	76.1667
	4	62.8333	69.3333	71.8333
	87	62.8333	68.8333	80.6667
	105	62.8333	68.2	75.5
	107	63.3333	59.1667	70.5
	128	63.3333	63.1667	75.8333
	116*	63.4	62	73.1667
Late lines
	25	73.8	74	82.3333
	51	72.1667	75.3333	80.5
	1	71.6	76.6667	81.25
	74	70.6	72.6667	77
	141*	70.3333	79.8333	85.3333
	37	70.3333	81.1667	85.3333
	127	68.3333	79.6667	80.5
	79	70	74.8333	80.5
	28	69.8333	71	79
	26	69.6	67	72.3333
	71	69.3333	72.8333	79.5
	36	69.3333	72.5	72.3333
	8	69.2	76.6	82.6667
	7	69	70.3333	77.8333
	112	68	74.4	83
Parents
	A58	N/D	71.0833	79.0556
	Kitaake	N/D	69.7667	78.3636
N/D, No data
